## Pax7-expressing satellite cells are indispensable for adult skeletal muscle regeneration

Ramkumar Sambasivan, Roseline Yao, Adrien Kissenpfennig, Laetitia Van Wittenberghe, Andràs Paldi, Barbara Gayraud-Morel, Hind Guenou, Bernard Malissen, Shahragim Tajbakhsh and Anne Galy

There was an error published in *Development* 138, 3647-3656.

The panel labels on the left indicating genotypes were misaligned in Fig. 5A. The corrected Fig. 5 appears in full below.

The authors apologise to readers for this mistake.

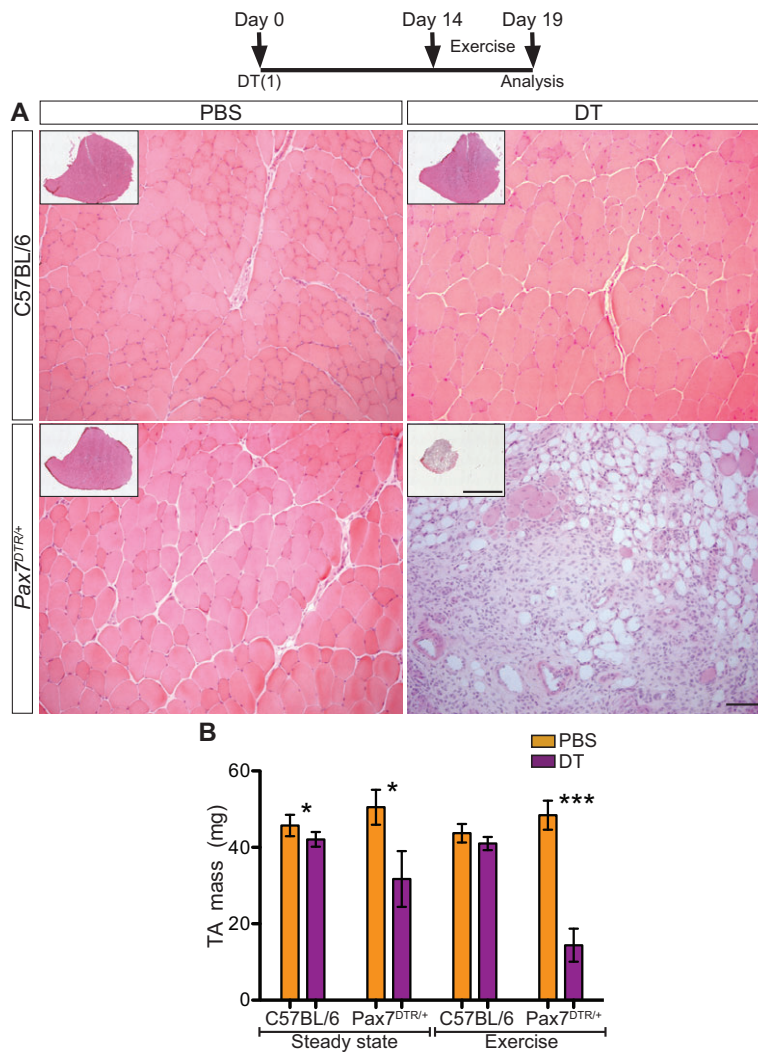

Source: https://cob.silverchair.com/dev/article-pdf/138/19/4333/1158364/4333.pdf
